# Supplementary material
Source: HighWire-hosted journal article supplement (https://openheart.bmj.com/content/11/1/e002526)
Supplement: inline-supplementary-material-1 [file inline-supplementary-material-1.pdf]

**Supplementary table S1.** Univariable and multivariable analyses for MACCE for the sensitivity analysis

|                                       | Univariate analysis |          | Sensitive analysis |          |
|---------------------------------------|---------------------|----------|--------------------|----------|
|                                       | HR (95% CI)         | <i>P</i> | HR (95% CI)        | <i>P</i> |
| HFpEF by the HFA-PEFF score           | 2.56 (1.63 – 4.01)  | < 0.001  | 1.65 (1.03 – 2.64) | 0.038    |
| Age                                   | 1.09 (1.05 – 1.12)  | < 0.001  | 1.07 (1.04 – 1.10) | < 0.001  |
| Body mass index                       | 0.94 (0.87 – 1.00)  | 0.058    |                    |          |
| Body surface area                     | 0.15 (0.05 – 0.49)  | 0.002    |                    |          |
| Chronic kidney disease $\geq$ grade 3 | 1.95 (1.25 – 3.04)  | 0.003    |                    |          |
| LV end-diastolic dimension            | 0.96 (0.91 – 1.01)  | 0.077    |                    |          |
| Moderate or severe TR                 | 2.80 (1.65 – 4.75)  | < 0.001  | 1.83 (1.07 – 3.15) | 0.028    |

Chronic kidney disease is defined as  $eGFR < 60 \text{ mL/min/1.73 m}^2$ .

*CI*, confidence interval; *GFR*, glomerular filtration rate; *HFpEF*, heart failure with preserved left ventricular ejection fraction; *HR*, hazard ratio; *TR*, tricuspid regurgitation.

**Supplementary table S2.** Characteristics and outcome of the study population divided by HFpEF or non-HFpEF in the H<sub>2</sub>FPEF score

|                                    | <b>HFpEF</b>     | <b>Non-HFpEF</b>  | <b>P*</b> |
|------------------------------------|------------------|-------------------|-----------|
|                                    | <b>(n = 560)</b> | <b>(n = 1119)</b> |           |
| Demographic data:                  |                  |                   |           |
| Age, years                         | 75 ± 8           | 69 ± 11           | < 0.001   |
| Sex, male                          | 355 (63.4)       | 863 (77.1)        | < 0.001   |
| Height, m                          | 1.62 ± 0.09      | 1.67 ± 0.09       | < 0.001   |
| Weight, kg                         | 66.1 ± 14.2      | 65.3 ± 11.3       | 0.256     |
| Body mass index, kg/m <sup>2</sup> | 24.9 ± 4.2       | 23.2 ± 2.9        | < 0.001   |
| Body surface area, m <sup>2</sup>  | 1.70 ± 0.20      | 1.73 ± 0.18       | 0.003     |
| CHADS <sub>2</sub> score           | 2 (1 – 2)        | 1 (0 – 2)         | < 0.001   |
| Congestive heart failure           | 59 (10.5)        | 71 (6.3)          | 0.002     |
| Hypertension                       | 526 (93.9)       | 399 (35.7)        | < 0.001   |
| Age ≥ 75 years                     | 298 (53.2)       | 366 (32.7)        | < 0.001   |
| Diabetes mellitus                  | 112 (19.6)       | 135 (12.1)        | < 0.001   |
| Prior stroke                       | 61 (10.9)        | 86 (7.7)          | 0.028     |
| Coronary artery disease            | 60 (10.8)        | 82 (7.4)          | 0.020     |
| Chronic kidney disease ≥ grade 3   | 23 (41.9)        | 354 (31.8)        | < 0.001   |
| Paroxysmal AF                      | 363 (64.8)       | 722 (64.5)        | 0.904     |

## 2D echocardiographic data:

|                                              |                         |                         |         |
|----------------------------------------------|-------------------------|-------------------------|---------|
| LV end-diastolic dimension,<br>mm            | 46.1 ± 4.6              | 45.5 ± 4.5              | 0.010   |
| LVEF, %                                      | 62.8 ± 4.0              | 62.1 ± 4.0              | 0.001   |
| LV mass index, g/m <sup>2</sup>              | 87.9 ± 17.9             | 79.6 ± 15.8             | < 0.001 |
| LA diameter, mm                              | 40.3 ± 6.4              | 37.2 ± 6.2              | < 0.001 |
| LA volume index, mL/m <sup>2</sup>           | 47.3 ± 14.9             | 41.3 ± 13.7             | < 0.001 |
| LA emptying fraction, %                      | 31.4 ± 14.7             | 33.1 ± 14.7             | 0.028   |
| E velocity, cm/s                             | 83.7 ± 19.9             | 71.3 ± 18.4             | < 0.001 |
| Septal e', cm/s                              | 6.8 ± 1.9               | 8.4 ± 2.3               | < 0.001 |
| Lateral e', cm/s                             | 8.8 ± 2.5               | 10.7 ± 2.9              | < 0.001 |
| Mean E/e'                                    | 11.3 ± 2.9              | 7.8 ± 2.4               | < 0.001 |
| TRV, m/s (N = 1547)                          | 2.5 ± 0.3               | 2.3 ± 0.3               | < 0.001 |
| Moderate or severe TR                        | 73 (13.1)               | 88 (7.9)                | 0.001   |
| Laboratory data:                             |                         |                         |         |
| BNP, pg/mL (N = 826)                         | 55.4<br>(33.9 – 123.1)  | 45.9<br>(20.6 – 96.2)   | < 0.001 |
| NT pro-BNP, pg/mL (N = 942)                  | 280.0<br>(97.0 – 708.2) | 156.2<br>(56.7 – 538.9) | < 0.001 |
| Estimated GFR, mL/min/1.73<br>m <sup>2</sup> | 63.2 ± 14.5             | 66.9 ± 14.5             | < 0.001 |
| HFA-PEFF score                               | 5 (4 – 6)               | 3 (2 – 4)               | < 0.001 |

|                                          |            |            |         |
|------------------------------------------|------------|------------|---------|
| Outcome:                                 | 6 (6 – 6)  | 5 (4 – 5)  | < 0.001 |
| 5-year MACCE                             |            |            |         |
| 5-year death                             | 33 (5.9)   | 44 (3.9)   | 0.070   |
| 5-year hospitalisation for heart failure | 19 (3.4)   | 19 (1.7)   | 0.028   |
| 5-year hospitalisation for stroke        | 5 (0.9)    | 6 (0.5)    | 0.393   |
| 5-year AF recurrence                     | 13 (2.3)   | 21 (1.9)   | 0.542   |
|                                          | 176 (31.4) | 318 (28.5) | 0.216   |

---

Data are expressed as mean  $\pm$  SD or median (interquartile range) or number (%).

\**P* values refer to the difference between HFpEF and non-HFpEF.

AF, atrial fibrillation; BNP, B-type natriuretic peptide; GFR, glomerular filtration rate; HFpEF, heart failure preserved left ventricular ejection fraction; LA, left atrial; LV, left ventricular; LVEF, left ventricular ejection fraction; MACCE, major adverse cardiovascular and cerebrovascular events; NT pro-BNP, N-terminal prohormone brain natriuretic peptide; TR, tricuspid regurgitation; TRV, tricuspid regurgitation peak velocity.

Okada et al.

**Supplementary table S3.** Univariable and multivariable analyses for MACCE for the H<sub>2</sub>FPEF score

|                                        | Univariate analysis |          | Multivariate analysis 1 |          | Multivariate analysis 2 |          |
|----------------------------------------|---------------------|----------|-------------------------|----------|-------------------------|----------|
|                                        | HR (95% CI)         | <i>P</i> | HR (95% CI)             | <i>P</i> | HR (95% CI)             | <i>P</i> |
| HFpEF by the H <sub>2</sub> FPEF score | 1.53 (0.97 – 2.40)  | 0.067    | 1.08 (0.67 – 1.72)      | 0.759    | 1.04 (0.65 – 1.67)      | 0.872    |
| Age                                    | 1.09 (1.05 – 1.12)  | < 0.001  | 1.08 (1.05 – 1.12)      | < 0.001  | 1.07 (1.04 – 1.11)      | < 0.001  |
| Male                                   | 0.73 (0.46 – 1.18)  | 0.199    | 0.99 (0.61 – 1.60)      | 0.952    | 1.04 (0.64 – 1.70)      | 0.882    |
| Diabetes mellitus                      | 0.97 (0.51 – 1.83)  | 0.922    |                         |          | 0.94 (0.50 – 1.79)      | 0.853    |
| Prior stroke                           | 1.57 (0.81 – 3.04)  | 0.186    |                         |          | 1.35 (0.69 – 2.63)      | 0.381    |
| Chronic kidney disease ≥grade 3        | 1.95 (1.25 – 3.04)  | 0.003    |                         |          | 1.37 (0.86 – 2.16)      | 0.183    |
| Moderate or severe TR                  | 2.80 (1.65 – 4.75)  | < 0.001  |                         |          | 1.94 (1.13 – 3.33)      | 0.017    |

Multivariate analysis model 1 includes HFpEF, age, and sex. Multivariate analysis model 2 includes model 1, hypertension, diabetes mellitus, prior stroke, chronic kidney disease defined as eGFR < 60 mL/min/1.73m<sup>2</sup>, and moderate or severe TR. *CI*, confidence interval; *GFR*, glomerular filtration rate; *HFpEF*, heart failure with preserved left ventricular ejection fraction; *HR*, hazard ratio; *TR*, tricuspid regurgitation.

Okada et al.

**Supplementary Figure S1**

Description of the HFA-PEFF score (A), and the distribution of the HFA-PEFF score (B) in this study.

| A                                                                         | Functional                                                                              | Morphological                                                                                                                  | Biomarker (SR)                                       | Biomarker (AF)                                         |
|---------------------------------------------------------------------------|-----------------------------------------------------------------------------------------|--------------------------------------------------------------------------------------------------------------------------------|------------------------------------------------------|--------------------------------------------------------|
| <b>Major criteria:<br/>2 points</b>                                       | E' (sep) <7 cm/s<br>or<br>E'(lat) <10 cm/s<br>or<br>Mean E/e' ≥15<br>or<br>TRV >2.8 m/s | LAVI >34 mL/m <sup>2</sup><br>or<br>LVMI ≥149/122 g/m <sup>2</sup> (M/F)<br>and RWT >0.42                                      | BNP >80 pg/mL<br>or<br>NT-pro-BNP >220 pg/mL         | BNP >240 pg/mL<br>or<br>NT-pro-BNP >660 pg/mL          |
| <b>Minor criteria:<br/>1 point</b>                                        | Mean E/e' 9–14                                                                          | LAVI 29–34 mL/m <sup>2</sup><br>or<br>LVMI >115/95 g/m <sup>2</sup> (M/F)<br>or<br>RWT >0.42<br>or<br>LV wall thickness ≥12 mm | BNP 35–80 pg/mL<br>or<br>NT-pro-BNP 125–220<br>pg/mL | BNP 105–240 pg/mL<br>or<br>NT-pro-BNP 365–660<br>pg/mL |
| <b>HFA-PEFF score ≥5 points: HFpEF (Eur Heart J. 2019; 40: 3297–3317)</b> |                                                                                         |                                                                                                                                |                                                      |                                                        |

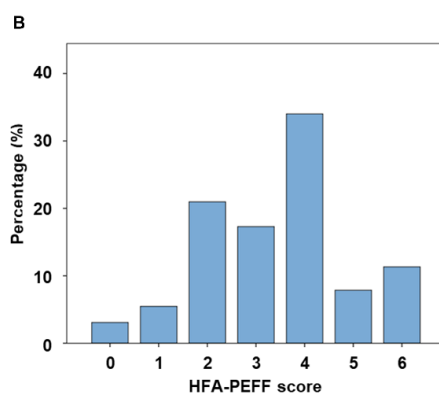

AF, atrial fibrillation; BNP, B-type natriuretic peptide; HFpEF, heart failure preserved left ventricular ejection fraction; LAVI, left atrial volume index; LV, left ventricular; LVMI, left ventricular mass index; RWT, relative wall thickness; TRV, tricuspid regurgitation peak velocity.

Okada et al.

**Supplementary Figure S2**Description of the H<sub>2</sub>FPEF score (A), and the distribution of the H<sub>2</sub>FPEF score (B) in this study.

| A         | Clinical Variable      | Values                                                             | Points   |
|-----------|------------------------|--------------------------------------------------------------------|----------|
| <b>H2</b> | Heavy                  | Body mass index >30 kg/m <sup>2</sup>                              | <b>2</b> |
|           | Hypertensive           | Hypertension or treatment with two or more anti-hypertensive drugs | <b>1</b> |
| <b>F</b>  | AF                     | Paroxysmal or Persistent                                           | <b>3</b> |
| <b>P</b>  | Pulmonary Hypertension | TRV >2.8 m/s                                                       | <b>1</b> |
| <b>E</b>  | Elder                  | Age >60 years                                                      | <b>1</b> |
| <b>F</b>  | Filling pressure       | E/e' ratio >9                                                      | <b>1</b> |

**H<sub>2</sub>FPEF score ≥6 points: HFpEF (Circulation. 2018; 138: 861–870)**

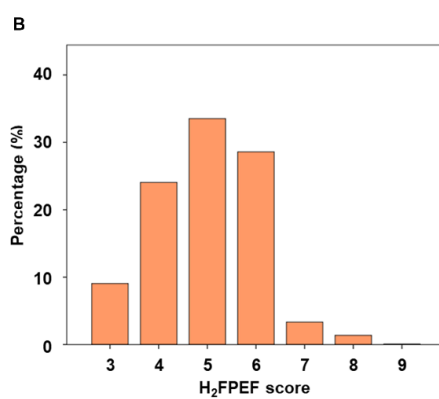

AF, atrial fibrillation; HFpEF, heart failure preserved left ventricular ejection fraction; TRV, tricuspid regurgitation peak velocity.

Okada et al.

**Supplementary Figure S3**

Kaplan–Meier analyses show the cumulative rate of the primary composite endpoint (A), all-cause death (B), hospitalisation for HF (C), and hospitalisation for stroke (D) stratified by the H<sub>2</sub>FPEF score.

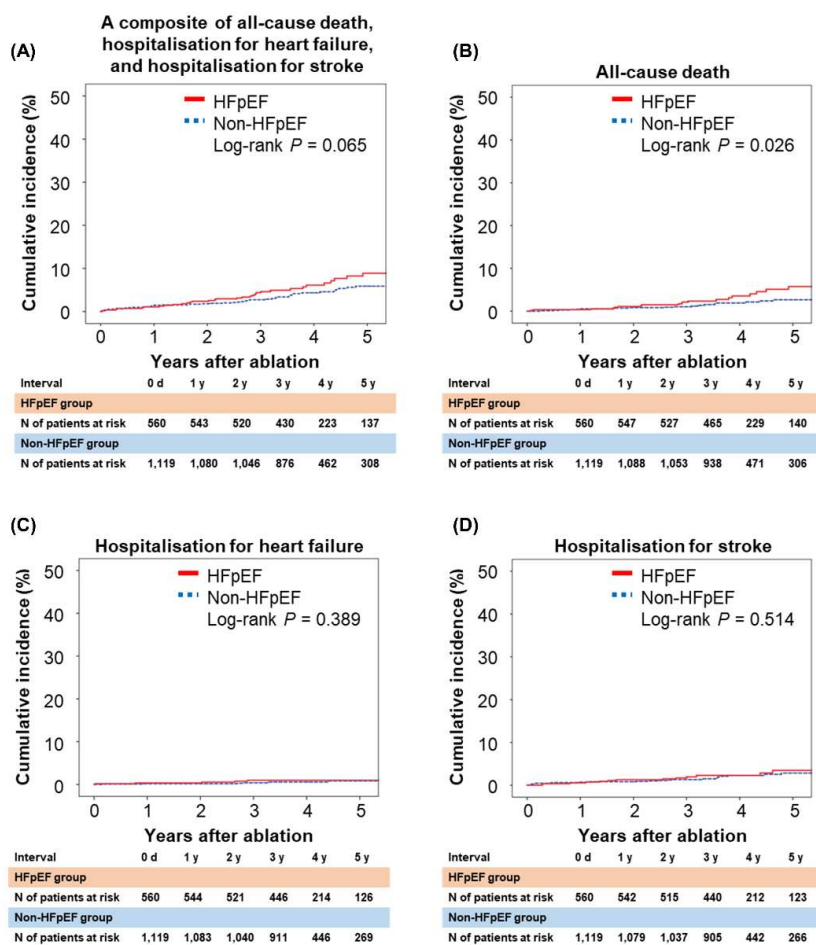

HFpEF, heart failure preserved left ventricular ejection fraction.
